# Supplementary material
Source: bioRxiv or medRxiv preprint supplement (https://medrxiv.org/highwire/filestream/80136/field_highwire_adjunct_files/8/2020.05.06.20089573-9.pdf)
Supplement: Supplementary file [file 2020.05.06.20089573-9.pdf]

**Supplementary Table 1.** Model performance in predicting future recurrence of SARS-CoV-2 nasopharyngeal swab PCR positivity. A) The key factors predicting subsequent recurrence of PCR positivity. B) Model performance: Sensitivity and specificity at different thresholds. Ct: cycle threshold.

A

| Feature                                     | Importance measure                     | Odds Ratio (95 CI)   | P Value                |        |
|---------------------------------------------|----------------------------------------|----------------------|------------------------|--------|
| Demographics                                | Age, yr                                | 0.083 (0.049, 0.128) | 0.615 (0.462, 0.812)   | 0.0007 |
|                                             | BMI, kg/m <sup>2</sup>                 | 0.055 (0.025, 0.087) | 0.535 (0.206, 1.374)   | 0.1956 |
| First test results during hospitalization   | White blood cell, × 10 <sup>9</sup> /L | 0.052 (0.023, 0.110) | 1.227 (0.950, 1.575)   | 0.1064 |
|                                             | Lymphocyte, × 10 <sup>9</sup> /L       | 0.041 (0.017, 0.113) | 1.210 (0.944, 1.544)   | 0.1222 |
|                                             | Procalcitonin, ng/mL                   | 0.048 (0.026, 0.068) | 56.757 (2.2, 2179.386) | 0.0207 |
|                                             | Partial pressure of oxygen, mmHg       | 0.055 (0.024, 0.089) | 1.325 (0.944, 1.869)   | 0.1021 |
|                                             | Ct value of nasopharyngeal swab RT-PCR | 0.036 (0.005, 0.055) | 0.781 (0.602, 1.016)   | 0.0625 |
| Lowest test results during hospitalization  | Cholinesterase, U/L                    | 0.118 (0.052, 0.152) | 1.861 (1.349, 2.604)   | 0.0002 |
|                                             | Fibrinogen, g/L                        | 0.075 (0.019, 0.097) | 0.747 (0.553, 0.994)   | 0.0503 |
|                                             | Albumin, g/L                           | 0.064 (0.045, 0.090) | 1.340 (0.935, 1.948)   | 0.1174 |
|                                             | Prealbumin, ng/L                       | 0.054 (0.033, 0.070) | 1.585 (1.189, 2.122)   | 0.0017 |
|                                             | Calcium, mmol/L                        | 0.045 (0.017, 0.087) | 1.301 (1.042, 1.607)   | 0.0163 |
|                                             | Creatinine, μmol/L                     | 0.025 (0.016, 0.074) | 0.824 (0.612, 1.103)   | 0.1971 |
|                                             | EGFR, ml/min/1.73m <sup>2</sup>        | 0.054 (0.019, 0.080) | 1.327 (1.020, 1.719)   | 0.0322 |
|                                             | Ct value of nasopharyngeal swab RT-PCR | 0.033 (0.009, 0.085) | 0.712 (0.538, 0.943)   | 0.0172 |
| Highest test results during hospitalization | Total bilirubin, μmol/L                | 0.089 (0.077, 0.178) | 0.686 (0.456, 0.987)   | 0.0551 |
|                                             | Lactate dehydrogenase, U/L             | 0.054 (0.034, 0.112) | 0.707 (0.418, 1.150)   | 0.1782 |
|                                             | Alkaline phosphatase, U/L              | 0.020 (0.009, 0.048) | 1.168 (0.913, 1.473)   | 0.1908 |

B

| <b>Threshold of high-risk</b> | <b>Sensitivity</b> | <b>Specificity</b> |
|-------------------------------|--------------------|--------------------|
| Threshold 1                   | 100%               | 12.8%              |
| Threshold 2                   | 93%                | 36.8%              |
| Threshold 3                   | 81%                | 59.7%              |
| Threshold 4                   | 68%                | 70.4%              |
| Threshold 5                   | 62%                | 79.1%              |
